# Supplementary material
Source: Springer Nature journal article supplement (https://www.springermedizin.de/resource/supplementary/12889_2010_3300_MOESM4_ESM.pdf/9488646)

■ Workforce productivity   ■ Household and leisure   ■ Health sector costs

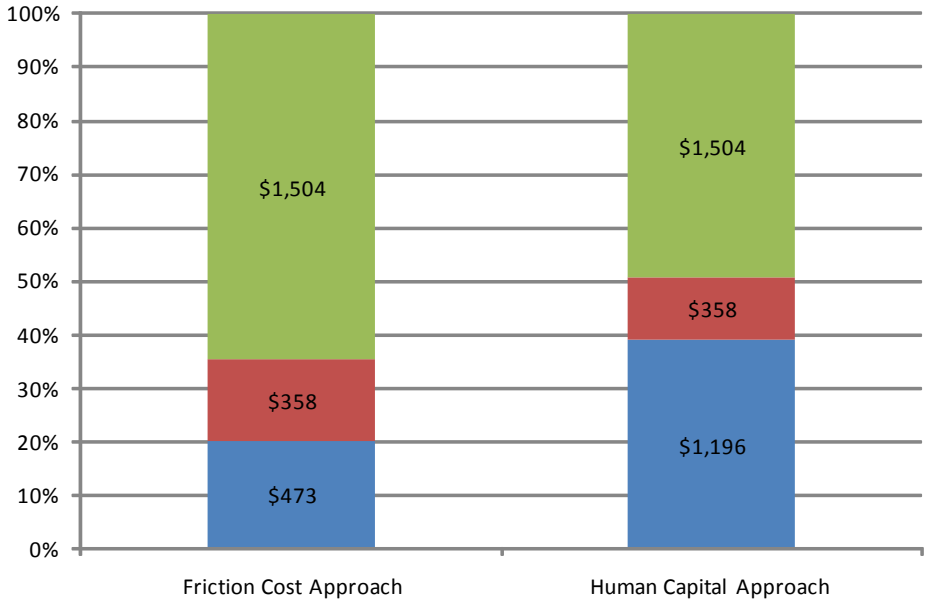

Supplement: MOESM4 [file 9488646]
